# Supplementary material for: Highly effective oxygen reduction activity and durability of titanium oxide modified PtAu/C electrocatalysts
Source: Royal Society of Chemistry journal article supplement (doi:10.1039/c4ra00125g), 2014-01-01
Supplement: c4ra00125g1.pdf [file c4ra00125g1.pdf]

## Supplementary Information

### Highly Effective Oxygen Reduction Activity and Durability of Titanium Oxide Modified PtAu/C Electrocatalysts

Chen-Wei Liu,<sup>a</sup> Chien-Ming Lai,<sup>b</sup> Jiunn-Nan Lin,<sup>b</sup> Li-Duan Tsai,<sup>b</sup> and Kuan-Wen  
Wang<sup>a,\*</sup>

<sup>a</sup> Institute of Materials Science and Engineering, National Central University,  
Taoyuan 320, Taiwan

<sup>b</sup> Material and Chemical Research Laboratories, Industrial Technology Research  
Institute, Hsinchu 310, Taiwan

\*To whom correspondence should be addressed,

E-mail: kuanwen.wang@gmail.com

Fax: 886-3-2805034, Tel: 886-3-4227151 ext 34906

Current address: Institute of Materials Science and Engineering, National Central  
University, No.300, Jhongda Rd., Taoyuan 320, Taiwan.

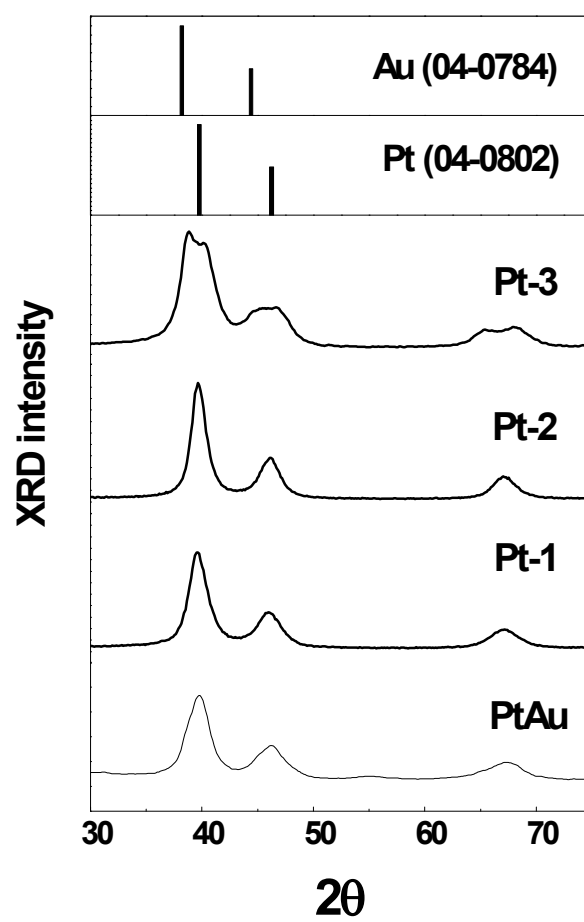

Figure S1 XRD pattern of Pt, Au, PtAu and various  $\text{TiO}_x$  modified PtAu/C.

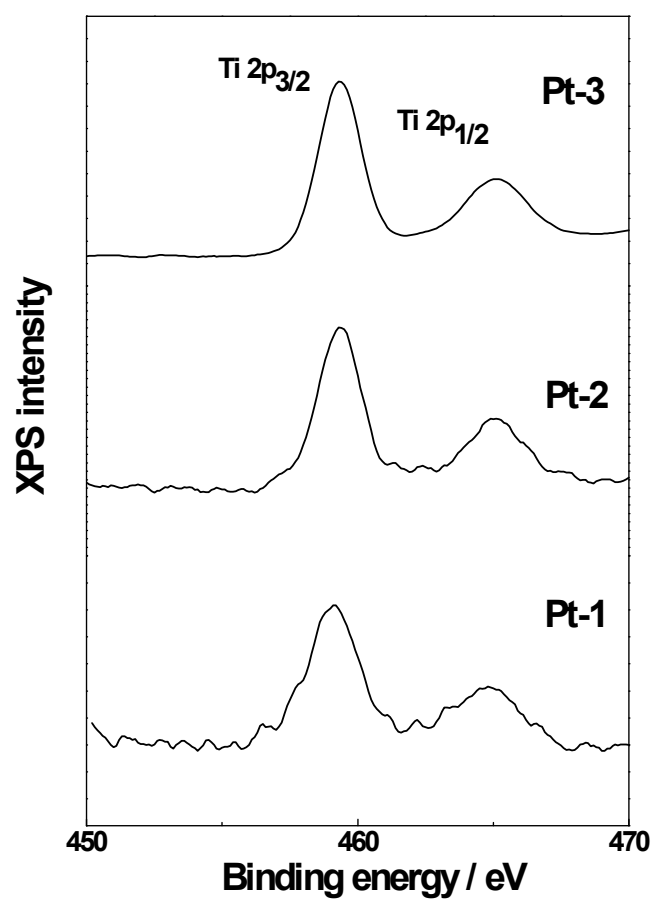

Figure S2 XPS spectrum of various TiO<sub>x</sub> modified PtAu/C.
